# Supplementary material for: Evaluation of Dorado v5.2.0 de novo basecalling models for the detection of tRNA modifications using RNA004 chemistry
Source: Research Square preprint supplement (doi:10.21203/rs.3.rs-8326794/v1), 2025-12-23
Supplement: Supplementary file 1 [file af35ba40c22c0d9c064ba5d4.docx]

Supplementary Figure 1: Comparison of basecalling errors obtained using Dorado v5.1.0 and v5.2.0 models in dRNA-seq of IVT tRNAs (U, C, A, G, red, green) and in tRNAs from *S. pombe*. Annotated tRNA modifications are indicated using the Modomics code. “NA U” designates tRNA sites that have no annotated modification at U sites, “NA C” for C sites etc.

Supplementary Figure 2: Difference in Ψml scores between v5.1.0 and v5.2.0 models in WT + q *S. pombe* tRNAs.
