# Supplementary material for: Evaluation of Dorado v5.2.0 de novo basecalling models for the detection of tRNA modifications using RNA004 chemistry
Source: Research Square preprint supplement (doi:10.21203/rs.3.rs-8326794/v1), 2025-12-23
Supplement: Supplementary file 2 [file f3bbfcf523ae063ae1b7ab98.xlsx]

## Sheet: Supplementary Table 1
Experiment number	Strain	Gene deletion	Queuosine	RT	Source	basecalled reads
BSP1	AEP1	wildtype	y	n	This study	156495
BSP3	AEP1	wildtype	n	n	This study	164785
BSP5	IVT	NA	n	n	This study	242817
FH017	AEP58	trm6∆	y	y	Rübsam et. al. 2025	79397
FH019	AEP58	wildtype	y	y	Rübsam et. al. 2025	3457255
FH020	IVT			y	Rübsam et. al. 2025	1248276
FH025 & FH023	AEP58	elp6∆	y	y	Rübsam et. al. 2025	2206076
FH028	AEP58	wildtype	y	y	Rübsam et. al. 2025	1486412
FH029	AEP58	trm8∆	y	y	Rübsam et. al. 2025	388283
SY001	AEP1	wildtype	n	n	Rübsam et. al. 2025	320831
SY003	AEP1	tit1∆	n	n	Rübsam et. al. 2025	363339
Sample	Constituent sequencing datasets	basecalled reads
IVT	BSP5 + FH020	1485624
WT	BSP3 + SY001	391592
WT+q	BSP1 + FH019 + FH028	4983027
trm6∆ + q	FH017	79037
trm8∆ + q	FH029	275779
tit1∆	SY003	220137
elp6∆ + q	FH023 + FH025	2153991

## Sheet: Supplementary Table 2
tRNA	position	nucleotide	modification	source	yeast
Ala-AGC-1	0	T
Ala-AGC-1	1	G
Ala-AGC-1	2	G
Ala-AGC-1	3	G
Ala-AGC-1	4	C
Ala-AGC-1	5	A
Ala-AGC-1	6	T
Ala-AGC-1	7	G
Ala-AGC-1	8	T
Ala-AGC-1	9	G	K	modomics	cerevisiae
Ala-AGC-1	10	G
Ala-AGC-1	11	T
Ala-AGC-1	12	G
Ala-AGC-1	13	T	P	motif_UNUAR	pombe
Ala-AGC-1	14	A
Ala-AGC-1	15	G
Ala-AGC-1	16	A
Ala-AGC-1	17	T	D	modomics	cerevisiae
Ala-AGC-1	18	G
Ala-AGC-1	19	G
Ala-AGC-1	20	T	D	modomics	cerevisiae
Ala-AGC-1	20.1	T	D	PMC8792297	pombe
Ala-AGC-1	20.2	NA
Ala-AGC-1	20.3	NA
Ala-AGC-1	21	A
Ala-AGC-1	22	T
Ala-AGC-1	23	C
Ala-AGC-1	24	A
Ala-AGC-1	25	C
Ala-AGC-1	26	G	R	modomics	cerevisiae
Ala-AGC-1	27	C
Ala-AGC-1	28	T
Ala-AGC-1	29	T
Ala-AGC-1	30	C
Ala-AGC-1	31	C
Ala-AGC-1	32	T
Ala-AGC-1	33	T
Ala-AGC-1	34	A	I	modomics	cerevisiae
Ala-AGC-1	35	G
Ala-AGC-1	36	C
Ala-AGC-1	37	A	O	modomics	cerevisiae
Ala-AGC-1	38	T	P	modomics	cerevisiae
Ala-AGC-1	39	G
Ala-AGC-1	40	G
Ala-AGC-1	41	A
Ala-AGC-1	42	A
Ala-AGC-1	43	G
Ala-AGC-1	44	A
Ala-AGC-1	45	G
Ala-AGC-1	45.1	NA
Ala-AGC-1	45.2	NA
Ala-AGC-1	45.3	NA
Ala-AGC-1	45.4	NA
Ala-AGC-1	45.5	NA
Ala-AGC-1	45.6	NA
Ala-AGC-1	45.7	NA
Ala-AGC-1	45.8	NA
Ala-AGC-1	45.9	NA
Ala-AGC-1	45.95	NA
Ala-AGC-1	46	G	7	motif_RAGGU	pombe
Ala-AGC-1	47	T	D	modomics	cerevisiae
Ala-AGC-1	48	C
Ala-AGC-1	49	C	?	PMC6380293	pombe
Ala-AGC-1	50	C
Ala-AGC-1	51	A
Ala-AGC-1	52	G
Ala-AGC-1	53	A
Ala-AGC-1	54	T	T	modomics	cerevisiae
Ala-AGC-1	55	T	P	modomics	cerevisiae
Ala-AGC-1	56	C
Ala-AGC-1	57	G
Ala-AGC-1	58	A
Ala-AGC-1	59	G
Ala-AGC-1	60	T
Ala-AGC-1	61	T
Ala-AGC-1	62	C
Ala-AGC-1	63	T
Ala-AGC-1	64	G
Ala-AGC-1	65	G
Ala-AGC-1	66	C
Ala-AGC-1	67	T
Ala-AGC-1	68	T
Ala-AGC-1	69	G
Ala-AGC-1	70	T
Ala-AGC-1	71	C
Ala-AGC-1	72	C
Ala-AGC-1	73	A
Ala-AGC-1	74	C
Ala-AGC-1	75	C
Ala-AGC-1	76	A
Ala-CGC-1	0	T
Ala-CGC-1	1	G
Ala-CGC-1	2	G
Ala-CGC-1	3	G
Ala-CGC-1	4	G
Ala-CGC-1	5	A
Ala-CGC-1	6	T
Ala-CGC-1	7	G
Ala-CGC-1	8	T
Ala-CGC-1	9	A
Ala-CGC-1	10	G
Ala-CGC-1	11	T
Ala-CGC-1	12	T
Ala-CGC-1	13	T	P	MoDorado	pombe
Ala-CGC-1	14	A
Ala-CGC-1	15	G
Ala-CGC-1	16	G
Ala-CGC-1	17	NA
Ala-CGC-1	18	G
Ala-CGC-1	19	G
Ala-CGC-1	20	T	D	PMC8792297	pombe
Ala-CGC-1	20.1	NA
Ala-CGC-1	20.2	NA
Ala-CGC-1	20.3	NA
Ala-CGC-1	21	A
Ala-CGC-1	22	T
Ala-CGC-1	23	A
Ala-CGC-1	24	A
Ala-CGC-1	25	C
Ala-CGC-1	26	G	R	PMC4697793	pombe
Ala-CGC-1	27	T
Ala-CGC-1	28	T
Ala-CGC-1	29	T
Ala-CGC-1	30	C
Ala-CGC-1	31	A
Ala-CGC-1	32	T
Ala-CGC-1	33	T
Ala-CGC-1	34	C
Ala-CGC-1	35	G
Ala-CGC-1	36	C
Ala-CGC-1	37	A
Ala-CGC-1	38	T
Ala-CGC-1	39	T
Ala-CGC-1	40	G
Ala-CGC-1	41	A
Ala-CGC-1	42	A
Ala-CGC-1	43	A
Ala-CGC-1	44	A
Ala-CGC-1	45	G
Ala-CGC-1	45.1	NA
Ala-CGC-1	45.2	NA
Ala-CGC-1	45.3	NA
Ala-CGC-1	45.4	NA
Ala-CGC-1	45.5	NA
Ala-CGC-1	45.6	NA
Ala-CGC-1	45.7	NA
Ala-CGC-1	45.8	NA
Ala-CGC-1	45.9	NA
Ala-CGC-1	45.95	NA
Ala-CGC-1	46	G	7	motif_RAGGU	pombe
Ala-CGC-1	47	T	P	MoDorado	pombe
Ala-CGC-1	48	C
Ala-CGC-1	49	C	?	PMC6380293	pombe
Ala-CGC-1	50	C
Ala-CGC-1	51	G
Ala-CGC-1	52	G
Ala-CGC-1	53	G
Ala-CGC-1	54	T	T	PMC1369962	cerevisiae
Ala-CGC-1	55	T	P	motif_RRUUCNA	pombe
Ala-CGC-1	56	C
Ala-CGC-1	57	G
Ala-CGC-1	58	A
Ala-CGC-1	59	T
Ala-CGC-1	60	T
Ala-CGC-1	61	C
Ala-CGC-1	62	C
Ala-CGC-1	63	C
Ala-CGC-1	64	G
Ala-CGC-1	65	G
Ala-CGC-1	66	C
Ala-CGC-1	67	A
Ala-CGC-1	68	T
Ala-CGC-1	69	C
Ala-CGC-1	70	T
Ala-CGC-1	71	C
Ala-CGC-1	72	C
Ala-CGC-1	73	A
Ala-CGC-1	74	C
Ala-CGC-1	75	C
Ala-CGC-1	76	A
Ala-TGC-1	0	T
Ala-TGC-1	1	G
Ala-TGC-1	2	G
Ala-TGC-1	3	G
Ala-TGC-1	4	C
Ala-TGC-1	5	A
Ala-TGC-1	6	T
Ala-TGC-1	7	G
Ala-TGC-1	8	T
Ala-TGC-1	9	G	K	modomics	cerevisiae
Ala-TGC-1	10	A
Ala-TGC-1	11	T
Ala-TGC-1	12	G
Ala-TGC-1	13	C
Ala-TGC-1	14	A
Ala-TGC-1	15	G
Ala-TGC-1	16	T	D	modomics	cerevisiae
Ala-TGC-1	17	NA
Ala-TGC-1	18	G
Ala-TGC-1	19	G
Ala-TGC-1	20	T	D	PMC8792297	pombe
Ala-TGC-1	20.1	NA
Ala-TGC-1	20.2	NA
Ala-TGC-1	20.3	NA
Ala-TGC-1	21	A
Ala-TGC-1	22	G
Ala-TGC-1	23	C
Ala-TGC-1	24	A
Ala-TGC-1	25	T
Ala-TGC-1	26	G	R	PMC4697793	pombe
Ala-TGC-1	27	C
Ala-TGC-1	28	T
Ala-TGC-1	29	C
Ala-TGC-1	30	G
Ala-TGC-1	31	C
Ala-TGC-1	32	T
Ala-TGC-1	33	T
Ala-TGC-1	34	T	&	Johansson 2008	cerevisiae
Ala-TGC-1	35	G
Ala-TGC-1	36	C
Ala-TGC-1	37	A
Ala-TGC-1	38	T
Ala-TGC-1	39	G
Ala-TGC-1	40	C
Ala-TGC-1	41	G
Ala-TGC-1	42	A
Ala-TGC-1	43	G
Ala-TGC-1	44	T
Ala-TGC-1	45	C
Ala-TGC-1	45.1	NA
Ala-TGC-1	45.2	NA
Ala-TGC-1	45.3	NA
Ala-TGC-1	45.4	NA
Ala-TGC-1	45.5	NA
Ala-TGC-1	45.6	NA
Ala-TGC-1	45.7	NA
Ala-TGC-1	45.8	NA
Ala-TGC-1	45.9	NA
Ala-TGC-1	45.95	NA
Ala-TGC-1	46	G
Ala-TGC-1	47	T	D	modomics	cerevisiae
Ala-TGC-1	48	C
Ala-TGC-1	49	C	?	PMC6380293	pombe
Ala-TGC-1	50	T
Ala-TGC-1	51	G
Ala-TGC-1	52	G
Ala-TGC-1	53	G
Ala-TGC-1	54	T	T	modomics	cerevisiae
Ala-TGC-1	55	T	P	modomics	cerevisiae
Ala-TGC-1	56	C
Ala-TGC-1	57	A
Ala-TGC-1	58	A
Ala-TGC-1	59	T
Ala-TGC-1	60	C
Ala-TGC-1	61	C
Ala-TGC-1	62	C
Ala-TGC-1	63	C
Ala-TGC-1	64	A
Ala-TGC-1	65	G
Ala-TGC-1	66	C
Ala-TGC-1	67	G
Ala-TGC-1	68	T
Ala-TGC-1	69	G
Ala-TGC-1	70	T
Ala-TGC-1	71	C
Ala-TGC-1	72	C
Ala-TGC-1	73	A
Ala-TGC-1	74	C
Ala-TGC-1	75	C
Ala-TGC-1	76	A
Arg-ACG-1	0	C
Arg-ACG-1	1	G
Arg-ACG-1	2	G
Arg-ACG-1	3	T
Arg-ACG-1	4	C
Arg-ACG-1	5	T
Arg-ACG-1	6	C
Arg-ACG-1	7	G
Arg-ACG-1	8	T
Arg-ACG-1	9	G	K	modomics	cerevisiae
Arg-ACG-1	10	G	L	modomics	cerevisiae
Arg-ACG-1	11	C
Arg-ACG-1	12	C
Arg-ACG-1	13	C
Arg-ACG-1	14	A
Arg-ACG-1	15	A
Arg-ACG-1	16	T	D	modomics	cerevisiae
Arg-ACG-1	17	NA
Arg-ACG-1	18	G
Arg-ACG-1	19	G
Arg-ACG-1	20	T	D	modomics	cerevisiae
Arg-ACG-1	20.1	T
Arg-ACG-1	20.2	NA
Arg-ACG-1	20.3	NA
Arg-ACG-1	21	A
Arg-ACG-1	22	A
Arg-ACG-1	23	G
Arg-ACG-1	24	G
Arg-ACG-1	25	C
Arg-ACG-1	26	G	R	PMC4697793	pombe
Arg-ACG-1	27	C
Arg-ACG-1	28	T	P	modomics	cerevisiae
Arg-ACG-1	29	T
Arg-ACG-1	30	G
Arg-ACG-1	31	A
Arg-ACG-1	32	C
Arg-ACG-1	33	T
Arg-ACG-1	34	A	I	modomics	cerevisiae
Arg-ACG-1	35	C
Arg-ACG-1	36	G
Arg-ACG-1	37	G
Arg-ACG-1	38	A
Arg-ACG-1	39	T	P	MoDorado	pombe
Arg-ACG-1	40	C
Arg-ACG-1	41	A
Arg-ACG-1	42	A
Arg-ACG-1	43	G
Arg-ACG-1	44	A
Arg-ACG-1	45	G
Arg-ACG-1	45.1	NA
Arg-ACG-1	45.2	NA
Arg-ACG-1	45.3	NA
Arg-ACG-1	45.4	NA
Arg-ACG-1	45.5	NA
Arg-ACG-1	45.6	NA
Arg-ACG-1	45.7	NA
Arg-ACG-1	45.8	NA
Arg-ACG-1	45.9	NA
Arg-ACG-1	45.95	NA
Arg-ACG-1	46	A
Arg-ACG-1	47	T	D	modomics	cerevisiae
Arg-ACG-1	48	T
Arg-ACG-1	49	C	?	PMC6380293	pombe
Arg-ACG-1	50	C
Arg-ACG-1	51	A
Arg-ACG-1	52	G
Arg-ACG-1	53	G
Arg-ACG-1	54	T	T	modomics	cerevisiae
Arg-ACG-1	55	T	P	modomics	cerevisiae
Arg-ACG-1	56	C
Arg-ACG-1	57	G
Arg-ACG-1	58	A	"	PMC11514469	cerevisiae
Arg-ACG-1	59	C
Arg-ACG-1	60	T
Arg-ACG-1	61	C
Arg-ACG-1	62	C
Arg-ACG-1	63	T
Arg-ACG-1	64	G
Arg-ACG-1	65	G
Arg-ACG-1	66	C
Arg-ACG-1	67	G
Arg-ACG-1	68	G
Arg-ACG-1	69	G
Arg-ACG-1	70	A
Arg-ACG-1	71	T
Arg-ACG-1	72	C
Arg-ACG-1	73	G
Arg-ACG-1	74	C
Arg-ACG-1	75	C
Arg-ACG-1	76	A
Arg-CCG-1	0	C
Arg-CCG-1	1	G
Arg-CCG-1	2	G
Arg-CCG-1	3	C
Arg-CCG-1	4	C
Arg-CCG-1	5	T
Arg-CCG-1	6	C
Arg-CCG-1	7	G
Arg-CCG-1	8	T
Arg-CCG-1	9	G
Arg-CCG-1	10	G
Arg-CCG-1	11	C
Arg-CCG-1	12	C
Arg-CCG-1	13	T
Arg-CCG-1	14	A
Arg-CCG-1	15	G
Arg-CCG-1	16	A
Arg-CCG-1	17	NA
Arg-CCG-1	18	A
Arg-CCG-1	19	G
Arg-CCG-1	20	T	D	PMC8792297	pombe
Arg-CCG-1	20.1	NA
Arg-CCG-1	20.2	NA
Arg-CCG-1	20.3	NA
Arg-CCG-1	21	A
Arg-CCG-1	22	A
Arg-CCG-1	23	G
Arg-CCG-1	24	G
Arg-CCG-1	25	C
Arg-CCG-1	26	G	R	PMC4697793	pombe
Arg-CCG-1	27	T
Arg-CCG-1	28	T
Arg-CCG-1	29	G
Arg-CCG-1	30	G
Arg-CCG-1	31	T	P	MoDorado	pombe
Arg-CCG-1	32	T	P	PMC4180118	cerevisiae
Arg-CCG-1	33	T
Arg-CCG-1	34	C
Arg-CCG-1	35	C
Arg-CCG-1	36	G
Arg-CCG-1	37	G
Arg-CCG-1	38	C
Arg-CCG-1	39	G
Arg-CCG-1	40	C
Arg-CCG-1	41	C
Arg-CCG-1	42	A
Arg-CCG-1	43	A
Arg-CCG-1	44	A
Arg-CCG-1	45	G
Arg-CCG-1	45.1	NA
Arg-CCG-1	45.2	NA
Arg-CCG-1	45.3	NA
Arg-CCG-1	45.4	NA
Arg-CCG-1	45.5	NA
Arg-CCG-1	45.6	NA
Arg-CCG-1	45.7	NA
Arg-CCG-1	45.8	NA
Arg-CCG-1	45.9	NA
Arg-CCG-1	45.95	NA
Arg-CCG-1	46	A
Arg-CCG-1	47	T
Arg-CCG-1	48	C	?	PMC6380293	pombe
Arg-CCG-1	49	G
Arg-CCG-1	50	C
Arg-CCG-1	51	G
Arg-CCG-1	52	A
Arg-CCG-1	53	G
Arg-CCG-1	54	T	T	PMC1369962	cerevisiae
Arg-CCG-1	55	G
Arg-CCG-1	56	C
Arg-CCG-1	57	A
Arg-CCG-1	58	A
Arg-CCG-1	59	A
Arg-CCG-1	60	T
Arg-CCG-1	61	C
Arg-CCG-1	62	T
Arg-CCG-1	63	C
Arg-CCG-1	64	G
Arg-CCG-1	65	C
Arg-CCG-1	66	C
Arg-CCG-1	67	G
Arg-CCG-1	68	T
Arg-CCG-1	69	G
Arg-CCG-1	70	G
Arg-CCG-1	71	T
Arg-CCG-1	72	C
Arg-CCG-1	73	G
Arg-CCG-1	74	C
Arg-CCG-1	75	C
Arg-CCG-1	76	A
Arg-CCT-1	0	C
Arg-CCT-1	1	T	P	MoDorado	pombe
Arg-CCT-1	2	T	D	PMC8792297	pombe
Arg-CCT-1	3	A
Arg-CCT-1	4	C
Arg-CCT-1	5	G
Arg-CCT-1	6	C
Arg-CCT-1	7	G
Arg-CCT-1	8	T
Arg-CCT-1	9	G	K	modomics	cerevisiae
Arg-CCT-1	10	G
Arg-CCT-1	11	C
Arg-CCT-1	12	G
Arg-CCT-1	13	C
Arg-CCT-1	14	A
Arg-CCT-1	15	A
Arg-CCT-1	16	T	D	modomics	cerevisiae
Arg-CCT-1	17	NA
Arg-CCT-1	18	G
Arg-CCT-1	19	G
Arg-CCT-1	20	T	D	modomics	cerevisiae
Arg-CCT-1	20.1	NA
Arg-CCT-1	20.2	NA
Arg-CCT-1	20.3	NA
Arg-CCT-1	21	A
Arg-CCT-1	22	G
Arg-CCT-1	23	C
Arg-CCT-1	24	G
Arg-CCT-1	25	C
Arg-CCT-1	26	A
Arg-CCT-1	27	T	P	MoDorado	pombe
Arg-CCT-1	28	C
Arg-CCT-1	29	T
Arg-CCT-1	30	C
Arg-CCT-1	31	A
Arg-CCT-1	32	T	P	MoDorado	pombe
Arg-CCT-1	33	T
Arg-CCT-1	34	C
Arg-CCT-1	35	C
Arg-CCT-1	36	T
Arg-CCT-1	37	A	6	modomics	cerevisiae
Arg-CCT-1	38	A
Arg-CCT-1	39	C
Arg-CCT-1	40	G
Arg-CCT-1	41	A
Arg-CCT-1	42	G
Arg-CCT-1	43	A
Arg-CCT-1	44	A
Arg-CCT-1	45	G
Arg-CCT-1	45.1	NA
Arg-CCT-1	45.2	NA
Arg-CCT-1	45.3	NA
Arg-CCT-1	45.4	NA
Arg-CCT-1	45.5	NA
Arg-CCT-1	45.6	NA
Arg-CCT-1	45.7	NA
Arg-CCT-1	45.8	NA
Arg-CCT-1	45.9	NA
Arg-CCT-1	45.95	NA
Arg-CCT-1	46	G	7	modomics	cerevisiae
Arg-CCT-1	47	T
Arg-CCT-1	48	T
Arg-CCT-1	49	G
Arg-CCT-1	50	C
Arg-CCT-1	51	G
Arg-CCT-1	52	G
Arg-CCT-1	53	G
Arg-CCT-1	54	T	T	modomics	cerevisiae
Arg-CCT-1	55	T	P	modomics	cerevisiae
Arg-CCT-1	56	C
Arg-CCT-1	57	G
Arg-CCT-1	58	A
Arg-CCT-1	59	G
Arg-CCT-1	60	T
Arg-CCT-1	61	C
Arg-CCT-1	62	C
Arg-CCT-1	63	C
Arg-CCT-1	64	G
Arg-CCT-1	65	T
Arg-CCT-1	66	C
Arg-CCT-1	67	G
Arg-CCT-1	68	T
Arg-CCT-1	69	G
Arg-CCT-1	70	T
Arg-CCT-1	71	A
Arg-CCT-1	72	A
Arg-CCT-1	73	G
Arg-CCT-1	74	C
Arg-CCT-1	75	C
Arg-CCT-1	76	A
Arg-TCG-1	0	C
Arg-TCG-1	1	G
Arg-TCG-1	2	G
Arg-TCG-1	3	G
Arg-TCG-1	4	T
Arg-TCG-1	5	G
Arg-TCG-1	6	T
Arg-TCG-1	7	G
Arg-TCG-1	8	T
Arg-TCG-1	9	A
Arg-TCG-1	10	G
Arg-TCG-1	11	C
Arg-TCG-1	12	C
Arg-TCG-1	13	T
Arg-TCG-1	14	A
Arg-TCG-1	15	A
Arg-TCG-1	16	T	D	PMC8792297	pombe
Arg-TCG-1	17	NA
Arg-TCG-1	18	G
Arg-TCG-1	19	G
Arg-TCG-1	20	T	D	PMC8792297	pombe
Arg-TCG-1	20.1	T	D	PMC8792297	pombe
Arg-TCG-1	20.2	NA
Arg-TCG-1	20.3	NA
Arg-TCG-1	21	A
Arg-TCG-1	22	A
Arg-TCG-1	23	G
Arg-TCG-1	24	G
Arg-TCG-1	25	C
Arg-TCG-1	26	G	R	PMC4697793	pombe
Arg-TCG-1	27	T
Arg-TCG-1	28	T
Arg-TCG-1	29	G
Arg-TCG-1	30	G
Arg-TCG-1	31	T
Arg-TCG-1	32	T
Arg-TCG-1	33	T
Arg-TCG-1	34	T
Arg-TCG-1	35	C
Arg-TCG-1	36	G
Arg-TCG-1	37	G
Arg-TCG-1	38	C
Arg-TCG-1	39	A
Arg-TCG-1	40	C
Arg-TCG-1	41	C
Arg-TCG-1	42	A
Arg-TCG-1	43	A
Arg-TCG-1	44	A
Arg-TCG-1	45	G
Arg-TCG-1	45.1	NA
Arg-TCG-1	45.2	NA
Arg-TCG-1	45.3	NA
Arg-TCG-1	45.4	NA
Arg-TCG-1	45.5	NA
Arg-TCG-1	45.6	NA
Arg-TCG-1	45.7	NA
Arg-TCG-1	45.8	NA
Arg-TCG-1	45.9	NA
Arg-TCG-1	45.95	NA
Arg-TCG-1	46	A
Arg-TCG-1	47	C
Arg-TCG-1	48	T
Arg-TCG-1	49	G
Arg-TCG-1	50	C
Arg-TCG-1	51	A
Arg-TCG-1	52	G
Arg-TCG-1	53	G
Arg-TCG-1	54	T	T	PMC1369962	cerevisiae
Arg-TCG-1	55	T	P	motif_RRUUCNA	pombe
Arg-TCG-1	56	C
Arg-TCG-1	57	G
Arg-TCG-1	58	A
Arg-TCG-1	59	G
Arg-TCG-1	60	T
Arg-TCG-1	61	C
Arg-TCG-1	62	C
Arg-TCG-1	63	T
Arg-TCG-1	64	G
Arg-TCG-1	65	T
Arg-TCG-1	66	C
Arg-TCG-1	67	A
Arg-TCG-1	68	C
Arg-TCG-1	69	A
Arg-TCG-1	70	C
Arg-TCG-1	71	T
Arg-TCG-1	72	C
Arg-TCG-1	73	G
Arg-TCG-1	74	C
Arg-TCG-1	75	C
Arg-TCG-1	76	A
Arg-TCT-1	0	A
Arg-TCT-1	1	G
Arg-TCT-1	2	C
Arg-TCT-1	3	T
Arg-TCT-1	4	C
Arg-TCT-1	5	C
Arg-TCT-1	6	C
Arg-TCT-1	7	G
Arg-TCT-1	8	T
Arg-TCT-1	9	G	K	modomics	cerevisiae
Arg-TCT-1	10	G	L	modomics	cerevisiae
Arg-TCT-1	11	C
Arg-TCT-1	12	C
Arg-TCT-1	13	T
Arg-TCT-1	14	A
Arg-TCT-1	15	A
Arg-TCT-1	16	T	D	modomics	cerevisiae
Arg-TCT-1	17	NA
Arg-TCT-1	18	G
Arg-TCT-1	19	G
Arg-TCT-1	20	C
Arg-TCT-1	20.1	T	D	PMC8792297	pombe
Arg-TCT-1	20.2	NA
Arg-TCT-1	20.3	NA
Arg-TCT-1	21	A
Arg-TCT-1	22	G
Arg-TCT-1	23	G
Arg-TCT-1	24	G
Arg-TCT-1	25	C
Arg-TCT-1	26	A
Arg-TCT-1	27	T	P	modomics	cerevisiae
Arg-TCT-1	28	T
Arg-TCT-1	29	T
Arg-TCT-1	30	G
Arg-TCT-1	31	A
Arg-TCT-1	32	C
Arg-TCT-1	33	T	P	MoDorado	pombe
Arg-TCT-1	34	T	1	modomics	cerevisiae
Arg-TCT-1	35	C
Arg-TCT-1	36	T
Arg-TCT-1	37	A	6	modomics	cerevisiae
Arg-TCT-1	38	A
Arg-TCT-1	39	T	P	modomics	cerevisiae
Arg-TCT-1	40	C
Arg-TCT-1	41	A
Arg-TCT-1	42	A
Arg-TCT-1	43	G
Arg-TCT-1	44	G
Arg-TCT-1	45	G
Arg-TCT-1	45.1	NA
Arg-TCT-1	45.2	NA
Arg-TCT-1	45.3	NA
Arg-TCT-1	45.4	NA
Arg-TCT-1	45.5	NA
Arg-TCT-1	45.6	NA
Arg-TCT-1	45.7	NA
Arg-TCT-1	45.8	NA
Arg-TCT-1	45.9	NA
Arg-TCT-1	45.95	NA
Arg-TCT-1	46	A
Arg-TCT-1	47	T	D	modomics	cerevisiae
Arg-TCT-1	48	T
Arg-TCT-1	49	G
Arg-TCT-1	50	C
Arg-TCT-1	51	G
Arg-TCT-1	52	G
Arg-TCT-1	53	G
Arg-TCT-1	54	T	T	modomics	cerevisiae
Arg-TCT-1	55	T	P	modomics	cerevisiae
Arg-TCT-1	56	C
Arg-TCT-1	57	G
Arg-TCT-1	58	A	"	PMC11514469	cerevisiae
Arg-TCT-1	59	G
Arg-TCT-1	60	T
Arg-TCT-1	61	C
Arg-TCT-1	62	C
Arg-TCT-1	63	C
Arg-TCT-1	64	G
Arg-TCT-1	65	C
Arg-TCT-1	66	C
Arg-TCT-1	67	G
Arg-TCT-1	68	G
Arg-TCT-1	69	G
Arg-TCT-1	70	A
Arg-TCT-1	71	G
Arg-TCT-1	72	C
Arg-TCT-1	73	T
Arg-TCT-1	74	C
Arg-TCT-1	75	C
Arg-TCT-1	76	A
Arg-TCT-2	0	A
Arg-TCT-2	1	G
Arg-TCT-2	2	C
Arg-TCT-2	3	T
Arg-TCT-2	4	C
Arg-TCT-2	5	C
Arg-TCT-2	6	C
Arg-TCT-2	7	G
Arg-TCT-2	8	T
Arg-TCT-2	9	G	K	modomics	cerevisiae
Arg-TCT-2	10	G	L	modomics	cerevisiae
Arg-TCT-2	11	C
Arg-TCT-2	12	C
Arg-TCT-2	13	T
Arg-TCT-2	14	A
Arg-TCT-2	15	A
Arg-TCT-2	16	T	D	modomics	cerevisiae
Arg-TCT-2	17	NA
Arg-TCT-2	18	G
Arg-TCT-2	19	G
Arg-TCT-2	20	C
Arg-TCT-2	20.1	T	D	PMC8792297	pombe
Arg-TCT-2	20.2	NA
Arg-TCT-2	20.3	NA
Arg-TCT-2	21	A
Arg-TCT-2	22	G
Arg-TCT-2	23	G
Arg-TCT-2	24	G
Arg-TCT-2	25	C
Arg-TCT-2	26	A
Arg-TCT-2	27	T	P	modomics	cerevisiae
Arg-TCT-2	28	T
Arg-TCT-2	29	T
Arg-TCT-2	30	G
Arg-TCT-2	31	A
Arg-TCT-2	32	C
Arg-TCT-2	33	T	P	MoDorado	pombe
Arg-TCT-2	34	T	1	modomics	cerevisiae
Arg-TCT-2	35	C
Arg-TCT-2	36	T
Arg-TCT-2	37	A	6	modomics	cerevisiae
Arg-TCT-2	38	A
Arg-TCT-2	39	T	P	modomics	cerevisiae
Arg-TCT-2	40	C
Arg-TCT-2	41	A
Arg-TCT-2	42	A
Arg-TCT-2	43	G
Arg-TCT-2	44	G
Arg-TCT-2	45	G
Arg-TCT-2	45.1	NA
Arg-TCT-2	45.2	NA
Arg-TCT-2	45.3	NA
Arg-TCT-2	45.4	NA
Arg-TCT-2	45.5	NA
Arg-TCT-2	45.6	NA
Arg-TCT-2	45.7	NA
Arg-TCT-2	45.8	NA
Arg-TCT-2	45.9	NA
Arg-TCT-2	45.95	NA
Arg-TCT-2	46	A
Arg-TCT-2	47	T	D	modomics	cerevisiae
Arg-TCT-2	48	T
Arg-TCT-2	49	G
Arg-TCT-2	50	T
Arg-TCT-2	51	G
Arg-TCT-2	52	G
Arg-TCT-2	53	G
Arg-TCT-2	54	T	T	modomics	cerevisiae
Arg-TCT-2	55	T	P	modomics	cerevisiae
Arg-TCT-2	56	C
Arg-TCT-2	57	G
Arg-TCT-2	58	A	"	PMC11514469	cerevisiae
Arg-TCT-2	59	G
Arg-TCT-2	60	T
Arg-TCT-2	61	C
Arg-TCT-2	62	C
Arg-TCT-2	63	C
Arg-TCT-2	64	G
Arg-TCT-2	65	C
Arg-TCT-2	66	C
Arg-TCT-2	67	G
Arg-TCT-2	68	G
Arg-TCT-2	69	G
Arg-TCT-2	70	A
Arg-TCT-2	71	G
Arg-TCT-2	72	C
Arg-TCT-2	73	T
Arg-TCT-2	74	C
Arg-TCT-2	75	C
Arg-TCT-2	76	A
Asn-GTT-1	0	C
Asn-GTT-1	1	G
Asn-GTT-1	2	G
Asn-GTT-1	3	T
Asn-GTT-1	4	C
Asn-GTT-1	5	G
Asn-GTT-1	6	G
Asn-GTT-1	7	G
Asn-GTT-1	8	T
Asn-GTT-1	9	A
Asn-GTT-1	10	G	L	modomics	cerevisiae
Asn-GTT-1	11	C
Asn-GTT-1	12	G
Asn-GTT-1	13	T
Asn-GTT-1	14	A
Asn-GTT-1	15	G
Asn-GTT-1	16	T	D	modomics	cerevisiae
Asn-GTT-1	17	T	D	modomics	cerevisiae
Asn-GTT-1	18	G
Asn-GTT-1	19	G
Asn-GTT-1	20	T	D	modomics	cerevisiae
Asn-GTT-1	20.1	T	D	modomics	cerevisiae
Asn-GTT-1	20.2	NA
Asn-GTT-1	20.3	NA
Asn-GTT-1	21	A
Asn-GTT-1	22	T
Asn-GTT-1	23	T
Asn-GTT-1	24	G
Asn-GTT-1	25	C
Asn-GTT-1	26	G	R	PMC4697793	pombe
Asn-GTT-1	27	C
Asn-GTT-1	28	A
Asn-GTT-1	29	C
Asn-GTT-1	30	G
Asn-GTT-1	31	A
Asn-GTT-1	32	C
Asn-GTT-1	33	T
Asn-GTT-1	34	G	Q	PMID: 6410456	pombe
Asn-GTT-1	35	T
Asn-GTT-1	36	T
Asn-GTT-1	37	A	6	modomics	cerevisiae
Asn-GTT-1	38	A
Asn-GTT-1	39	T	P	modomics	cerevisiae
Asn-GTT-1	40	C
Asn-GTT-1	41	G
Asn-GTT-1	42	T
Asn-GTT-1	43	G
Asn-GTT-1	44	A
Asn-GTT-1	45	G
Asn-GTT-1	45.1	NA
Asn-GTT-1	45.2	NA
Asn-GTT-1	45.3	NA
Asn-GTT-1	45.4	NA
Asn-GTT-1	45.5	NA
Asn-GTT-1	45.6	NA
Asn-GTT-1	45.7	NA
Asn-GTT-1	45.8	NA
Asn-GTT-1	45.9	NA
Asn-GTT-1	45.95	NA
Asn-GTT-1	46	G	7	motif_RAGGU	pombe
Asn-GTT-1	47	T	D	modomics	cerevisiae
Asn-GTT-1	48	C	?	PMC6380293	pombe
Asn-GTT-1	49	G
Asn-GTT-1	50	A
Asn-GTT-1	51	G
Asn-GTT-1	52	G
Asn-GTT-1	53	G
Asn-GTT-1	54	T	T	modomics	cerevisiae
Asn-GTT-1	55	T	P	modomics	cerevisiae
Asn-GTT-1	56	C
Asn-GTT-1	57	G
Asn-GTT-1	58	A	"	PMC11514469	cerevisiae
Asn-GTT-1	59	G
Asn-GTT-1	60	T
Asn-GTT-1	61	C
Asn-GTT-1	62	C
Asn-GTT-1	63	C
Asn-GTT-1	64	T
Asn-GTT-1	65	C
Asn-GTT-1	66	C
Asn-GTT-1	67	C
Asn-GTT-1	68	T
Asn-GTT-1	69	G
Asn-GTT-1	70	A
Asn-GTT-1	71	C
Asn-GTT-1	72	C
Asn-GTT-1	73	G
Asn-GTT-1	74	C
Asn-GTT-1	75	C
Asn-GTT-1	76	A
Asn-GTT-2	0	C
Asn-GTT-2	1	G
Asn-GTT-2	2	G
Asn-GTT-2	3	T
Asn-GTT-2	4	C
Asn-GTT-2	5	G
Asn-GTT-2	6	G
Asn-GTT-2	7	G
Asn-GTT-2	8	T
Asn-GTT-2	9	A
Asn-GTT-2	10	G	L	modomics	cerevisiae
Asn-GTT-2	11	C
Asn-GTT-2	12	A
Asn-GTT-2	13	T
Asn-GTT-2	14	A
Asn-GTT-2	15	G
Asn-GTT-2	16	T	D	modomics	cerevisiae
Asn-GTT-2	17	T	D	modomics	cerevisiae
Asn-GTT-2	18	G
Asn-GTT-2	19	G
Asn-GTT-2	20	T	D	modomics	cerevisiae
Asn-GTT-2	20.1	T	D	modomics	cerevisiae
Asn-GTT-2	20.2	NA
Asn-GTT-2	20.3	NA
Asn-GTT-2	21	A
Asn-GTT-2	22	T
Asn-GTT-2	23	T
Asn-GTT-2	24	G
Asn-GTT-2	25	C
Asn-GTT-2	26	G	R	PMC4697793	pombe
Asn-GTT-2	27	C
Asn-GTT-2	28	A
Asn-GTT-2	29	C
Asn-GTT-2	30	G
Asn-GTT-2	31	A
Asn-GTT-2	32	C
Asn-GTT-2	33	T
Asn-GTT-2	34	G	Q	PMID: 6410456	pombe
Asn-GTT-2	35	T
Asn-GTT-2	36	T
Asn-GTT-2	37	A	6	modomics	cerevisiae
Asn-GTT-2	38	A
Asn-GTT-2	39	T	P	modomics	cerevisiae
Asn-GTT-2	40	C
Asn-GTT-2	41	G
Asn-GTT-2	42	T
Asn-GTT-2	43	G
Asn-GTT-2	44	A
Asn-GTT-2	45	G
Asn-GTT-2	45.1	NA
Asn-GTT-2	45.2	NA
Asn-GTT-2	45.3	NA
Asn-GTT-2	45.4	NA
Asn-GTT-2	45.5	NA
Asn-GTT-2	45.6	NA
Asn-GTT-2	45.7	NA
Asn-GTT-2	45.8	NA
Asn-GTT-2	45.9	NA
Asn-GTT-2	45.95	NA
Asn-GTT-2	46	G	7	motif_RAGGU	pombe
Asn-GTT-2	47	T	D	modomics	cerevisiae
Asn-GTT-2	48	C	?	PMC6380293	pombe
Asn-GTT-2	49	G
Asn-GTT-2	50	A
Asn-GTT-2	51	G
Asn-GTT-2	52	G
Asn-GTT-2	53	G
Asn-GTT-2	54	T	T	modomics	cerevisiae
Asn-GTT-2	55	T	P	modomics	cerevisiae
Asn-GTT-2	56	C
Asn-GTT-2	57	G
Asn-GTT-2	58	A	"	PMC11514469	cerevisiae
Asn-GTT-2	59	G
Asn-GTT-2	60	T
Asn-GTT-2	61	C
Asn-GTT-2	62	C
Asn-GTT-2	63	C
Asn-GTT-2	64	T
Asn-GTT-2	65	C
Asn-GTT-2	66	C
Asn-GTT-2	67	C
Asn-GTT-2	68	T
Asn-GTT-2	69	G
Asn-GTT-2	70	A
Asn-GTT-2	71	C
Asn-GTT-2	72	C
Asn-GTT-2	73	G
Asn-GTT-2	74	C
Asn-GTT-2	75	C
Asn-GTT-2	76	A
Asp-GTC-1	0	C
Asp-GTC-1	1	T
Asp-GTC-1	2	C
Asp-GTC-1	3	T
Asp-GTC-1	4	C
Asp-GTC-1	5	C
Asp-GTC-1	6	T
Asp-GTC-1	7	T
Asp-GTC-1	8	T
Asp-GTC-1	9	A
Asp-GTC-1	10	G
Asp-GTC-1	11	T
Asp-GTC-1	12	A
Asp-GTC-1	13	T	P	modomics	cerevisiae
Asp-GTC-1	14	A
Asp-GTC-1	15	G
Asp-GTC-1	16	G
Asp-GTC-1	17	NA
Asp-GTC-1	18	G
Asp-GTC-1	19	G
Asp-GTC-1	20	T	D	modomics	cerevisiae
Asp-GTC-1	20.1	NA
Asp-GTC-1	20.2	NA
Asp-GTC-1	20.3	NA
Asp-GTC-1	21	A
Asp-GTC-1	22	G
Asp-GTC-1	23	T
Asp-GTC-1	24	A
Asp-GTC-1	25	C
Asp-GTC-1	26	A
Asp-GTC-1	27	C
Asp-GTC-1	28	A
Asp-GTC-1	29	A
Asp-GTC-1	30	G
Asp-GTC-1	31	C
Asp-GTC-1	32	C
Asp-GTC-1	33	T
Asp-GTC-1	34	G	Q	PMID: 6410456	pombe
Asp-GTC-1	35	T
Asp-GTC-1	36	C
Asp-GTC-1	37	A
Asp-GTC-1	38	C	?	Becker 2012	pombe
Asp-GTC-1	39	G
Asp-GTC-1	40	C
Asp-GTC-1	41	T
Asp-GTC-1	42	T
Asp-GTC-1	43	G
Asp-GTC-1	44	C
Asp-GTC-1	45	NA
Asp-GTC-1	45.1	NA
Asp-GTC-1	45.2	NA
Asp-GTC-1	45.3	NA
Asp-GTC-1	45.4	NA
Asp-GTC-1	45.5	NA
Asp-GTC-1	45.6	NA
Asp-GTC-1	45.7	NA
Asp-GTC-1	45.8	NA
Asp-GTC-1	45.9	NA
Asp-GTC-1	45.95	NA
Asp-GTC-1	46	A
Asp-GTC-1	47	G
Asp-GTC-1	48	C
Asp-GTC-1	49	C	?	PMC6380293	pombe
Asp-GTC-1	50	C	?	PMC6380293	pombe
Asp-GTC-1	51	G
Asp-GTC-1	52	G
Asp-GTC-1	53	G
Asp-GTC-1	54	T	T	modomics	cerevisiae
Asp-GTC-1	55	T	P	modomics	cerevisiae
Asp-GTC-1	56	C
Asp-GTC-1	57	G
Asp-GTC-1	58	A
Asp-GTC-1	59	A
Asp-GTC-1	60	T
Asp-GTC-1	61	C	?	PMC6380293	pombe
Asp-GTC-1	62	C	?	PMC6380293	pombe
Asp-GTC-1	63	C	?	PMC6380293	pombe
Asp-GTC-1	64	G
Asp-GTC-1	65	G
Asp-GTC-1	66	A
Asp-GTC-1	67	G
Asp-GTC-1	68	G
Asp-GTC-1	69	G
Asp-GTC-1	70	A
Asp-GTC-1	71	G
Asp-GTC-1	72	A
Asp-GTC-1	73	G
Asp-GTC-1	74	C
Asp-GTC-1	75	C
Asp-GTC-1	76	A
Cys-GCA-1	0	A
Cys-GCA-1	1	G
Cys-GCA-1	2	G
Cys-GCA-1	3	G
Cys-GCA-1	4	G
Cys-GCA-1	5	T
Cys-GCA-1	6	C
Cys-GCA-1	7	A
Cys-GCA-1	8	T
Cys-GCA-1	9	A
Cys-GCA-1	10	G
Cys-GCA-1	11	C
Cys-GCA-1	12	T
Cys-GCA-1	13	C
Cys-GCA-1	14	A
Cys-GCA-1	15	G
Cys-GCA-1	16	T	D	modomics	cerevisiae
Cys-GCA-1	17	NA
Cys-GCA-1	18	G
Cys-GCA-1	19	G
Cys-GCA-1	20	T	D	modomics	cerevisiae
Cys-GCA-1	20.1	T	D	PMC8792297	pombe
Cys-GCA-1	20.2	NA
Cys-GCA-1	20.3	NA
Cys-GCA-1	21	A
Cys-GCA-1	22	G
Cys-GCA-1	23	A
Cys-GCA-1	24	G
Cys-GCA-1	25	T	P	MoDorado	pombe
Cys-GCA-1	26	G	R	PMC4697793	pombe
Cys-GCA-1	27	A
Cys-GCA-1	28	G
Cys-GCA-1	29	G
Cys-GCA-1	30	G
Cys-GCA-1	31	A
Cys-GCA-1	32	T	P	modomics	cerevisiae
Cys-GCA-1	33	T
Cys-GCA-1	34	G
Cys-GCA-1	35	C
Cys-GCA-1	36	A
Cys-GCA-1	37	G
Cys-GCA-1	38	A
Cys-GCA-1	39	T	P	modomics	cerevisiae
Cys-GCA-1	40	C
Cys-GCA-1	41	C
Cys-GCA-1	42	C
Cys-GCA-1	43	C
Cys-GCA-1	44	A
Cys-GCA-1	45	G
Cys-GCA-1	45.1	NA
Cys-GCA-1	45.2	NA
Cys-GCA-1	45.3	NA
Cys-GCA-1	45.4	NA
Cys-GCA-1	45.5	NA
Cys-GCA-1	45.6	NA
Cys-GCA-1	45.7	NA
Cys-GCA-1	45.8	NA
Cys-GCA-1	45.9	NA
Cys-GCA-1	45.95	NA
Cys-GCA-1	46	G	7	modomics	cerevisiae
Cys-GCA-1	47	T	D	modomics	cerevisiae
Cys-GCA-1	48	C	?	PMC6380293	pombe
Cys-GCA-1	49	G
Cys-GCA-1	50	C
Cys-GCA-1	51	T
Cys-GCA-1	52	G
Cys-GCA-1	53	G
Cys-GCA-1	54	T	T	modomics	cerevisiae
Cys-GCA-1	55	T	P	modomics	cerevisiae
Cys-GCA-1	56	C
Cys-GCA-1	57	A
Cys-GCA-1	58	A	"	PMC11514469	cerevisiae
Cys-GCA-1	59	A
Cys-GCA-1	60	T
Cys-GCA-1	61	C
Cys-GCA-1	62	C
Cys-GCA-1	63	G
Cys-GCA-1	64	G
Cys-GCA-1	65	C
Cys-GCA-1	66	T
Cys-GCA-1	67	G
Cys-GCA-1	68	G
Cys-GCA-1	69	T
Cys-GCA-1	70	C
Cys-GCA-1	71	C
Cys-GCA-1	72	C
Cys-GCA-1	73	T
Cys-GCA-1	74	C
Cys-GCA-1	75	C
Cys-GCA-1	76	A
Cys-GCA-2	0	A
Cys-GCA-2	1	G
Cys-GCA-2	2	G
Cys-GCA-2	3	G
Cys-GCA-2	4	G
Cys-GCA-2	5	T
Cys-GCA-2	6	C
Cys-GCA-2	7	A
Cys-GCA-2	8	T
Cys-GCA-2	9	A
Cys-GCA-2	10	G
Cys-GCA-2	11	C
Cys-GCA-2	12	T
Cys-GCA-2	13	C
Cys-GCA-2	14	A
Cys-GCA-2	15	G
Cys-GCA-2	16	T	D	modomics	cerevisiae
Cys-GCA-2	17	NA
Cys-GCA-2	18	G
Cys-GCA-2	19	G
Cys-GCA-2	20	T	D	modomics	cerevisiae
Cys-GCA-2	20.1	T	D	PMC8792297	pombe
Cys-GCA-2	20.2	NA
Cys-GCA-2	20.3	NA
Cys-GCA-2	21	A
Cys-GCA-2	22	G
Cys-GCA-2	23	A
Cys-GCA-2	24	G
Cys-GCA-2	25	T	P	MoDorado	pombe
Cys-GCA-2	26	G	R	PMC4697793	pombe
Cys-GCA-2	27	A
Cys-GCA-2	28	G
Cys-GCA-2	29	G
Cys-GCA-2	30	G
Cys-GCA-2	31	A
Cys-GCA-2	32	T	P	modomics	cerevisiae
Cys-GCA-2	33	T
Cys-GCA-2	34	G
Cys-GCA-2	35	C
Cys-GCA-2	36	A
Cys-GCA-2	37	G
Cys-GCA-2	38	A
Cys-GCA-2	39	T	P	modomics	cerevisiae
Cys-GCA-2	40	C
Cys-GCA-2	41	C
Cys-GCA-2	42	C
Cys-GCA-2	43	C
Cys-GCA-2	44	A
Cys-GCA-2	45	G
Cys-GCA-2	45.1	NA
Cys-GCA-2	45.2	NA
Cys-GCA-2	45.3	NA
Cys-GCA-2	45.4	NA
Cys-GCA-2	45.5	NA
Cys-GCA-2	45.6	NA
Cys-GCA-2	45.7	NA
Cys-GCA-2	45.8	NA
Cys-GCA-2	45.9	NA
Cys-GCA-2	45.95	NA
Cys-GCA-2	46	G	7	modomics	cerevisiae
Cys-GCA-2	47	T	D	modomics	cerevisiae
Cys-GCA-2	48	C	?	PMC6380293	pombe
Cys-GCA-2	49	A
Cys-GCA-2	50	C
Cys-GCA-2	51	T
Cys-GCA-2	52	G
Cys-GCA-2	53	G
Cys-GCA-2	54	T	T	modomics	cerevisiae
Cys-GCA-2	55	T	P	modomics	cerevisiae
Cys-GCA-2	56	C
Cys-GCA-2	57	A
Cys-GCA-2	58	A	"	PMC11514469	cerevisiae
Cys-GCA-2	59	A
Cys-GCA-2	60	T
Cys-GCA-2	61	C
Cys-GCA-2	62	C
Cys-GCA-2	63	G
Cys-GCA-2	64	G
Cys-GCA-2	65	T
Cys-GCA-2	66	T
Cys-GCA-2	67	G
Cys-GCA-2	68	G
Cys-GCA-2	69	T
Cys-GCA-2	70	C
Cys-GCA-2	71	C
Cys-GCA-2	72	C
Cys-GCA-2	73	T
Cys-GCA-2	74	C
Cys-GCA-2	75	C
Cys-GCA-2	76	A
Gln-CTG-1	0	A
Gln-CTG-1	1	G
Gln-CTG-1	2	G
Gln-CTG-1	3	T
Gln-CTG-1	4	T
Gln-CTG-1	5	G
Gln-CTG-1	6	T
Gln-CTG-1	7	A
Gln-CTG-1	8	T
Gln-CTG-1	9	G
Gln-CTG-1	10	G
Gln-CTG-1	11	T
Gln-CTG-1	12	G
Gln-CTG-1	13	T	P	motif_UNUAR	pombe
Gln-CTG-1	14	A
Gln-CTG-1	15	A
Gln-CTG-1	16	T	D	modomics	cerevisiae
Gln-CTG-1	17	NA
Gln-CTG-1	18	G
Gln-CTG-1	19	G
Gln-CTG-1	20	T	D	modomics	cerevisiae
Gln-CTG-1	20.1	T	D	modomics	cerevisiae
Gln-CTG-1	20.2	NA
Gln-CTG-1	20.3	NA
Gln-CTG-1	21	A
Gln-CTG-1	22	G
Gln-CTG-1	23	C
Gln-CTG-1	24	A
Gln-CTG-1	25	C
Gln-CTG-1	26	G	R	PMC4697793	pombe
Gln-CTG-1	27	T	P	PMC4224642	cerevisiae
Gln-CTG-1	28	G
Gln-CTG-1	29	A
Gln-CTG-1	30	G
Gln-CTG-1	31	A
Gln-CTG-1	32	T	P	modomics	cerevisiae
Gln-CTG-1	33	T
Gln-CTG-1	34	C
Gln-CTG-1	35	T
Gln-CTG-1	36	G
Gln-CTG-1	37	A
Gln-CTG-1	38	T	P	modomics	cerevisiae
Gln-CTG-1	39	T	P	PMC4180118	cerevisiae
Gln-CTG-1	40	C
Gln-CTG-1	41	T
Gln-CTG-1	42	C
Gln-CTG-1	43	G
Gln-CTG-1	44	A
Gln-CTG-1	45	NA
Gln-CTG-1	45.1	NA
Gln-CTG-1	45.2	NA
Gln-CTG-1	45.3	NA
Gln-CTG-1	45.4	NA
Gln-CTG-1	45.5	NA
Gln-CTG-1	45.6	NA
Gln-CTG-1	45.7	NA
Gln-CTG-1	45.8	NA
Gln-CTG-1	45.9	NA
Gln-CTG-1	45.95	NA
Gln-CTG-1	46	G
Gln-CTG-1	47	A
Gln-CTG-1	48	C
Gln-CTG-1	49	C	?	PMC6380293	pombe
Gln-CTG-1	50	T
Gln-CTG-1	51	G
Gln-CTG-1	52	G
Gln-CTG-1	53	G
Gln-CTG-1	54	T	T	modomics	cerevisiae
Gln-CTG-1	55	T	P	modomics	cerevisiae
Gln-CTG-1	56	C
Gln-CTG-1	57	G
Gln-CTG-1	58	A	"	PMC11514469	cerevisiae
Gln-CTG-1	59	T
Gln-CTG-1	60	T
Gln-CTG-1	61	C
Gln-CTG-1	62	C
Gln-CTG-1	63	C
Gln-CTG-1	64	A
Gln-CTG-1	65	G
Gln-CTG-1	66	T
Gln-CTG-1	67	A
Gln-CTG-1	68	C
Gln-CTG-1	69	G
Gln-CTG-1	70	A
Gln-CTG-1	71	C
Gln-CTG-1	72	C
Gln-CTG-1	73	T	X	modomics	cerevisiae
Gln-CTG-1	74	C
Gln-CTG-1	75	C
Gln-CTG-1	76	A
Gln-TTG-1	0	A
Gln-TTG-1	1	G
Gln-TTG-1	2	G
Gln-TTG-1	3	T
Gln-TTG-1	4	T
Gln-TTG-1	5	G
Gln-TTG-1	6	T
Gln-TTG-1	7	A
Gln-TTG-1	8	T
Gln-TTG-1	9	G
Gln-TTG-1	10	G
Gln-TTG-1	11	T
Gln-TTG-1	12	G
Gln-TTG-1	13	T	P	motif_UNUAR	pombe
Gln-TTG-1	14	A
Gln-TTG-1	15	A
Gln-TTG-1	16	T	D	modomics	cerevisiae
Gln-TTG-1	17	NA
Gln-TTG-1	18	G
Gln-TTG-1	19	G
Gln-TTG-1	20	T	D	modomics	cerevisiae
Gln-TTG-1	20.1	T	D	modomics	cerevisiae
Gln-TTG-1	20.2	NA
Gln-TTG-1	20.3	NA
Gln-TTG-1	21	A
Gln-TTG-1	22	G
Gln-TTG-1	23	C
Gln-TTG-1	24	A
Gln-TTG-1	25	C
Gln-TTG-1	26	G	R	PMC4697793	pombe
Gln-TTG-1	27	T
Gln-TTG-1	28	G
Gln-TTG-1	29	A
Gln-TTG-1	30	G
Gln-TTG-1	31	A
Gln-TTG-1	32	T	P	modomics	cerevisiae
Gln-TTG-1	33	T	P	PMC4180118	cerevisiae
Gln-TTG-1	34	T	3	Björk 2007	cerevisiae
Gln-TTG-1	35	T
Gln-TTG-1	36	G
Gln-TTG-1	37	A
Gln-TTG-1	38	T	P	modomics	cerevisiae
Gln-TTG-1	39	T	P	PMC4180118	cerevisiae
Gln-TTG-1	40	C
Gln-TTG-1	41	T	P	PMC4180118	cerevisiae
Gln-TTG-1	42	C
Gln-TTG-1	43	G
Gln-TTG-1	44	A
Gln-TTG-1	45	NA
Gln-TTG-1	45.1	NA
Gln-TTG-1	45.2	NA
Gln-TTG-1	45.3	NA
Gln-TTG-1	45.4	NA
Gln-TTG-1	45.5	NA
Gln-TTG-1	45.6	NA
Gln-TTG-1	45.7	NA
Gln-TTG-1	45.8	NA
Gln-TTG-1	45.9	NA
Gln-TTG-1	45.95	NA
Gln-TTG-1	46	G
Gln-TTG-1	47	A
Gln-TTG-1	48	C
Gln-TTG-1	49	C	?	PMC6380293	pombe
Gln-TTG-1	50	T
Gln-TTG-1	51	G
Gln-TTG-1	52	G
Gln-TTG-1	53	G
Gln-TTG-1	54	T	T	modomics	cerevisiae
Gln-TTG-1	55	T	P	modomics	cerevisiae
Gln-TTG-1	56	C
Gln-TTG-1	57	G
Gln-TTG-1	58	A	"	PMC11514469	cerevisiae
Gln-TTG-1	59	T
Gln-TTG-1	60	T
Gln-TTG-1	61	C
Gln-TTG-1	62	C
Gln-TTG-1	63	C
Gln-TTG-1	64	A
Gln-TTG-1	65	G
Gln-TTG-1	66	T
Gln-TTG-1	67	A
Gln-TTG-1	68	C
Gln-TTG-1	69	G
Gln-TTG-1	70	A
Gln-TTG-1	71	C
Gln-TTG-1	72	C
Gln-TTG-1	73	T
Gln-TTG-1	74	C
Gln-TTG-1	75	C
Gln-TTG-1	76	A
Gln-TTG-2	0	A
Gln-TTG-2	1	G
Gln-TTG-2	2	G
Gln-TTG-2	3	T
Gln-TTG-2	4	T
Gln-TTG-2	5	G
Gln-TTG-2	6	T
Gln-TTG-2	7	A
Gln-TTG-2	8	T
Gln-TTG-2	9	G
Gln-TTG-2	10	G
Gln-TTG-2	11	T
Gln-TTG-2	12	G
Gln-TTG-2	13	T	P	motif_UNUAR	pombe
Gln-TTG-2	14	A
Gln-TTG-2	15	G
Gln-TTG-2	16	C
Gln-TTG-2	17	NA
Gln-TTG-2	18	G
Gln-TTG-2	19	G
Gln-TTG-2	20	T	D	modomics	cerevisiae
Gln-TTG-2	20.1	T	D	modomics	cerevisiae
Gln-TTG-2	20.2	NA
Gln-TTG-2	20.3	NA
Gln-TTG-2	21	A
Gln-TTG-2	22	G
Gln-TTG-2	23	C
Gln-TTG-2	24	A
Gln-TTG-2	25	C
Gln-TTG-2	26	G	R	PMC4697793	pombe
Gln-TTG-2	27	C
Gln-TTG-2	28	G
Gln-TTG-2	29	A
Gln-TTG-2	30	G
Gln-TTG-2	31	A
Gln-TTG-2	32	T	P	modomics	cerevisiae
Gln-TTG-2	33	T	P	PMC4180118	cerevisiae
Gln-TTG-2	34	T	3	Björk 2007	cerevisiae
Gln-TTG-2	35	T
Gln-TTG-2	36	G
Gln-TTG-2	37	A
Gln-TTG-2	38	T	P	modomics	cerevisiae
Gln-TTG-2	39	T	P	PMC4180118	cerevisiae
Gln-TTG-2	40	C
Gln-TTG-2	41	T	P	PMC4180118	cerevisiae
Gln-TTG-2	42	C
Gln-TTG-2	43	G
Gln-TTG-2	44	A
Gln-TTG-2	45	NA
Gln-TTG-2	45.1	NA
Gln-TTG-2	45.2	NA
Gln-TTG-2	45.3	NA
Gln-TTG-2	45.4	NA
Gln-TTG-2	45.5	NA
Gln-TTG-2	45.6	NA
Gln-TTG-2	45.7	NA
Gln-TTG-2	45.8	NA
Gln-TTG-2	45.9	NA
Gln-TTG-2	45.95	NA
Gln-TTG-2	46	G
Gln-TTG-2	47	A
Gln-TTG-2	48	T
Gln-TTG-2	49	C
Gln-TTG-2	50	T
Gln-TTG-2	51	G
Gln-TTG-2	52	G
Gln-TTG-2	53	G
Gln-TTG-2	54	T	T	modomics	cerevisiae
Gln-TTG-2	55	T	P	modomics	cerevisiae
Gln-TTG-2	56	C
Gln-TTG-2	57	G
Gln-TTG-2	58	A	"	PMC11514469	cerevisiae
Gln-TTG-2	59	C
Gln-TTG-2	60	T
Gln-TTG-2	61	C
Gln-TTG-2	62	C
Gln-TTG-2	63	C
Gln-TTG-2	64	A
Gln-TTG-2	65	G
Gln-TTG-2	66	T
Gln-TTG-2	67	A
Gln-TTG-2	68	C
Gln-TTG-2	69	G
Gln-TTG-2	70	A
Gln-TTG-2	71	C
Gln-TTG-2	72	C
Gln-TTG-2	73	T
Gln-TTG-2	74	C
Gln-TTG-2	75	C
Gln-TTG-2	76	A
Glu-CTC-1	0	C
Glu-CTC-1	1	T
Glu-CTC-1	2	C
Glu-CTC-1	3	C
Glu-CTC-1	4	G
Glu-CTC-1	5	T
Glu-CTC-1	6	C
Glu-CTC-1	7	A
Glu-CTC-1	8	T
Glu-CTC-1	9	G
Glu-CTC-1	10	G
Glu-CTC-1	11	T
Glu-CTC-1	12	C
Glu-CTC-1	13	C
Glu-CTC-1	14	A
Glu-CTC-1	15	G
Glu-CTC-1	16	T	D	PMC8792297	pombe
Glu-CTC-1	17	NA
Glu-CTC-1	18	G
Glu-CTC-1	19	G
Glu-CTC-1	20	C
Glu-CTC-1	20.1	T	D	modomics	cerevisiae
Glu-CTC-1	20.2	NA
Glu-CTC-1	20.3	NA
Glu-CTC-1	21	A
Glu-CTC-1	22	G
Glu-CTC-1	23	G
Glu-CTC-1	24	A
Glu-CTC-1	25	T
Glu-CTC-1	26	T	P	modomics	cerevisiae
Glu-CTC-1	27	C
Glu-CTC-1	28	A
Glu-CTC-1	29	T
Glu-CTC-1	30	C
Glu-CTC-1	31	G
Glu-CTC-1	32	C
Glu-CTC-1	33	T	P	PMC4180118	cerevisiae
Glu-CTC-1	34	C
Glu-CTC-1	35	T
Glu-CTC-1	36	C
Glu-CTC-1	37	A
Glu-CTC-1	38	C	?	Becker 2012	pombe
Glu-CTC-1	39	C
Glu-CTC-1	40	G
Glu-CTC-1	41	A
Glu-CTC-1	42	T
Glu-CTC-1	43	G
Glu-CTC-1	44	C
Glu-CTC-1	45	NA
Glu-CTC-1	45.1	NA
Glu-CTC-1	45.2	NA
Glu-CTC-1	45.3	NA
Glu-CTC-1	45.4	NA
Glu-CTC-1	45.5	NA
Glu-CTC-1	45.6	NA
Glu-CTC-1	45.7	NA
Glu-CTC-1	45.8	NA
Glu-CTC-1	45.9	NA
Glu-CTC-1	45.95	NA
Glu-CTC-1	46	G
Glu-CTC-1	47	G
Glu-CTC-1	48	C
Glu-CTC-1	49	G
Glu-CTC-1	50	G
Glu-CTC-1	51	G
Glu-CTC-1	52	G
Glu-CTC-1	53	G
Glu-CTC-1	54	T	T	modomics	cerevisiae
Glu-CTC-1	55	T	P	modomics	cerevisiae
Glu-CTC-1	56	C
Glu-CTC-1	57	G
Glu-CTC-1	58	A
Glu-CTC-1	59	T
Glu-CTC-1	60	T
Glu-CTC-1	61	C
Glu-CTC-1	62	C
Glu-CTC-1	63	C
Glu-CTC-1	64	C
Glu-CTC-1	65	C
Glu-CTC-1	66	T
Glu-CTC-1	67	G
Glu-CTC-1	68	A
Glu-CTC-1	69	C
Glu-CTC-1	70	G
Glu-CTC-1	71	G
Glu-CTC-1	72	A
Glu-CTC-1	73	G
Glu-CTC-1	74	C
Glu-CTC-1	75	C
Glu-CTC-1	76	A
Glu-TTC-1	0	C
Glu-TTC-1	1	T
Glu-TTC-1	2	C
Glu-TTC-1	3	C
Glu-TTC-1	4	G
Glu-TTC-1	5	T
Glu-TTC-1	6	T
Glu-TTC-1	7	G
Glu-TTC-1	8	T
Glu-TTC-1	9	G
Glu-TTC-1	10	G
Glu-TTC-1	11	T
Glu-TTC-1	12	C
Glu-TTC-1	13	C
Glu-TTC-1	14	A
Glu-TTC-1	15	A
Glu-TTC-1	16	C
Glu-TTC-1	17	NA
Glu-TTC-1	18	G
Glu-TTC-1	19	G
Glu-TTC-1	20	C
Glu-TTC-1	20.1	T	D	modomics	cerevisiae
Glu-TTC-1	20.2	NA
Glu-TTC-1	20.3	NA
Glu-TTC-1	21	A
Glu-TTC-1	22	G
Glu-TTC-1	23	G
Glu-TTC-1	24	A
Glu-TTC-1	25	T
Glu-TTC-1	26	T	P	modomics	cerevisiae
Glu-TTC-1	27	C
Glu-TTC-1	28	G
Glu-TTC-1	29	T
Glu-TTC-1	30	C
Glu-TTC-1	31	G
Glu-TTC-1	32	C
Glu-TTC-1	33	T
Glu-TTC-1	34	T	3	modomics	cerevisiae
Glu-TTC-1	35	T
Glu-TTC-1	36	C
Glu-TTC-1	37	A
Glu-TTC-1	38	C	?	Becker 2012	pombe
Glu-TTC-1	39	C
Glu-TTC-1	40	G
Glu-TTC-1	41	A
Glu-TTC-1	42	C
Glu-TTC-1	43	G
Glu-TTC-1	44	C
Glu-TTC-1	45	NA
Glu-TTC-1	45.1	NA
Glu-TTC-1	45.2	NA
Glu-TTC-1	45.3	NA
Glu-TTC-1	45.4	NA
Glu-TTC-1	45.5	NA
Glu-TTC-1	45.6	NA
Glu-TTC-1	45.7	NA
Glu-TTC-1	45.8	NA
Glu-TTC-1	45.9	NA
Glu-TTC-1	45.95	NA
Glu-TTC-1	46	G
Glu-TTC-1	47	G
Glu-TTC-1	48	T
Glu-TTC-1	49	C	?	PMC6380293	pombe
Glu-TTC-1	50	G
Glu-TTC-1	51	G
Glu-TTC-1	52	G
Glu-TTC-1	53	G
Glu-TTC-1	54	T	T	modomics	cerevisiae
Glu-TTC-1	55	T	P	modomics	cerevisiae
Glu-TTC-1	56	C
Glu-TTC-1	57	G
Glu-TTC-1	58	A
Glu-TTC-1	59	C
Glu-TTC-1	60	T
Glu-TTC-1	61	C
Glu-TTC-1	62	C
Glu-TTC-1	63	C
Glu-TTC-1	64	C
Glu-TTC-1	65	G
Glu-TTC-1	66	C
Glu-TTC-1	67	A
Glu-TTC-1	68	A
Glu-TTC-1	69	C
Glu-TTC-1	70	G
Glu-TTC-1	71	G
Glu-TTC-1	72	A
Glu-TTC-1	73	G
Glu-TTC-1	74	C
Glu-TTC-1	75	C
Glu-TTC-1	76	A
Gly-CCC-1	0	T
Gly-CCC-1	1	G
Gly-CCC-1	2	C
Gly-CCC-1	3	A
Gly-CCC-1	4	T
Gly-CCC-1	5	T
Gly-CCC-1	6	A
Gly-CCC-1	7	G
Gly-CCC-1	8	T
Gly-CCC-1	9	G	K	PMC4697793	cerevisiae
Gly-CCC-1	10	G
Gly-CCC-1	11	T
Gly-CCC-1	12	G
Gly-CCC-1	13	T	P	modomics	cerevisiae
Gly-CCC-1	14	A
Gly-CCC-1	15	G
Gly-CCC-1	16	C
Gly-CCC-1	17	NA
Gly-CCC-1	18	G
Gly-CCC-1	19	G
Gly-CCC-1	20	T	D	modomics	cerevisiae
Gly-CCC-1	20.1	NA
Gly-CCC-1	20.2	NA
Gly-CCC-1	20.3	NA
Gly-CCC-1	21	A
Gly-CCC-1	22	A
Gly-CCC-1	23	C
Gly-CCC-1	24	A
Gly-CCC-1	25	T
Gly-CCC-1	26	T
Gly-CCC-1	27	G
Gly-CCC-1	28	G
Gly-CCC-1	29	A
Gly-CCC-1	30	G
Gly-CCC-1	31	C
Gly-CCC-1	32	T	P	PMC4224642	cerevisiae
Gly-CCC-1	33	T	P	PMC4180118	cerevisiae
Gly-CCC-1	34	C
Gly-CCC-1	35	C
Gly-CCC-1	36	C
Gly-CCC-1	37	A
Gly-CCC-1	38	T
Gly-CCC-1	39	G
Gly-CCC-1	40	C
Gly-CCC-1	41	T
Gly-CCC-1	42	C
Gly-CCC-1	43	T
Gly-CCC-1	44	A
Gly-CCC-1	45	NA
Gly-CCC-1	45.1	NA
Gly-CCC-1	45.2	NA
Gly-CCC-1	45.3	NA
Gly-CCC-1	45.4	NA
Gly-CCC-1	45.5	NA
Gly-CCC-1	45.6	NA
Gly-CCC-1	45.7	NA
Gly-CCC-1	45.8	NA
Gly-CCC-1	45.9	NA
Gly-CCC-1	45.95	NA
Gly-CCC-1	46	G
Gly-CCC-1	47	C
Gly-CCC-1	48	T
Gly-CCC-1	49	C	?	PMC6380293	pombe
Gly-CCC-1	50	C
Gly-CCC-1	51	G
Gly-CCC-1	52	G
Gly-CCC-1	53	G
Gly-CCC-1	54	T	T	modomics	cerevisiae
Gly-CCC-1	55	T	P	modomics	cerevisiae
Gly-CCC-1	56	C
Gly-CCC-1	57	G
Gly-CCC-1	58	A
Gly-CCC-1	59	C
Gly-CCC-1	60	T
Gly-CCC-1	61	C
Gly-CCC-1	62	C
Gly-CCC-1	63	C
Gly-CCC-1	64	G
Gly-CCC-1	65	G
Gly-CCC-1	66	C
Gly-CCC-1	67	T
Gly-CCC-1	68	G
Gly-CCC-1	69	A
Gly-CCC-1	70	T
Gly-CCC-1	71	G
Gly-CCC-1	72	C
Gly-CCC-1	73	A
Gly-CCC-1	74	C
Gly-CCC-1	75	C
Gly-CCC-1	76	A
Gly-GCC-1	0	T
Gly-GCC-1	1	G
Gly-GCC-1	2	C
Gly-GCC-1	3	T
Gly-GCC-1	4	T
Gly-GCC-1	5	T
Gly-GCC-1	6	G
Gly-GCC-1	7	G
Gly-GCC-1	8	T
Gly-GCC-1	9	G	K	modomics	cerevisiae
Gly-GCC-1	10	G
Gly-GCC-1	11	T
Gly-GCC-1	12	T
Gly-GCC-1	13	T	P	modomics	cerevisiae
Gly-GCC-1	14	A
Gly-GCC-1	15	G
Gly-GCC-1	16	T	D	modomics	cerevisiae
Gly-GCC-1	17	NA
Gly-GCC-1	18	G
Gly-GCC-1	19	G
Gly-GCC-1	20	T	D	modomics	cerevisiae
Gly-GCC-1	20.1	NA
Gly-GCC-1	20.2	NA
Gly-GCC-1	20.3	NA
Gly-GCC-1	21	A
Gly-GCC-1	22	T
Gly-GCC-1	23	A
Gly-GCC-1	24	A
Gly-GCC-1	25	T
Gly-GCC-1	26	G	R	PMC4697793	pombe
Gly-GCC-1	27	A
Gly-GCC-1	28	A
Gly-GCC-1	29	T
Gly-GCC-1	30	C
Gly-GCC-1	31	G
Gly-GCC-1	32	T	P	modomics	cerevisiae
Gly-GCC-1	33	T
Gly-GCC-1	34	G
Gly-GCC-1	35	C
Gly-GCC-1	36	C
Gly-GCC-1	37	A
Gly-GCC-1	38	T	P	modomics	cerevisiae
Gly-GCC-1	39	C
Gly-GCC-1	40	G
Gly-GCC-1	41	A
Gly-GCC-1	42	T
Gly-GCC-1	43	T
Gly-GCC-1	44	C
Gly-GCC-1	45	NA
Gly-GCC-1	45.1	NA
Gly-GCC-1	45.2	NA
Gly-GCC-1	45.3	NA
Gly-GCC-1	45.4	NA
Gly-GCC-1	45.5	NA
Gly-GCC-1	45.6	NA
Gly-GCC-1	45.7	NA
Gly-GCC-1	45.8	NA
Gly-GCC-1	45.9	NA
Gly-GCC-1	45.95	NA
Gly-GCC-1	46	G
Gly-GCC-1	47	A
Gly-GCC-1	48	C
Gly-GCC-1	49	C	?	PMC6380293	pombe
Gly-GCC-1	50	C	?	PMC6380293	pombe
Gly-GCC-1	51	G
Gly-GCC-1	52	G
Gly-GCC-1	53	G
Gly-GCC-1	54	T	T	modomics	cerevisiae
Gly-GCC-1	55	T	P	modomics	cerevisiae
Gly-GCC-1	56	C
Gly-GCC-1	57	G
Gly-GCC-1	58	A
Gly-GCC-1	59	T
Gly-GCC-1	60	T
Gly-GCC-1	61	C	?	PMC6380293	pombe
Gly-GCC-1	62	C	?	PMC6380293	pombe
Gly-GCC-1	63	C	?	PMC6380293	pombe
Gly-GCC-1	64	G
Gly-GCC-1	65	G
Gly-GCC-1	66	C
Gly-GCC-1	67	C
Gly-GCC-1	68	A
Gly-GCC-1	69	A
Gly-GCC-1	70	A
Gly-GCC-1	71	G
Gly-GCC-1	72	C
Gly-GCC-1	73	A
Gly-GCC-1	74	C
Gly-GCC-1	75	C
Gly-GCC-1	76	A
Gly-TCC-1	0	T
Gly-TCC-1	1	G
Gly-TCC-1	2	C
Gly-TCC-1	3	A
Gly-TCC-1	4	T
Gly-TCC-1	5	C
Gly-TCC-1	6	A
Gly-TCC-1	7	G
Gly-TCC-1	8	T
Gly-TCC-1	9	G	K	PMC4697793	cerevisiae
Gly-TCC-1	10	G
Gly-TCC-1	11	T
Gly-TCC-1	12	G
Gly-TCC-1	13	T	P	modomics	cerevisiae
Gly-TCC-1	14	A
Gly-TCC-1	15	G
Gly-TCC-1	16	C
Gly-TCC-1	17	NA
Gly-TCC-1	18	G
Gly-TCC-1	19	G
Gly-TCC-1	20	T	D	modomics	cerevisiae
Gly-TCC-1	20.1	NA
Gly-TCC-1	20.2	NA
Gly-TCC-1	20.3	NA
Gly-TCC-1	21	A
Gly-TCC-1	22	A
Gly-TCC-1	23	C
Gly-TCC-1	24	A
Gly-TCC-1	25	T
Gly-TCC-1	26	C
Gly-TCC-1	27	A
Gly-TCC-1	28	A
Gly-TCC-1	29	T
Gly-TCC-1	30	G
Gly-TCC-1	31	C
Gly-TCC-1	32	C
Gly-TCC-1	33	T	P	PMC4180118	cerevisiae
Gly-TCC-1	34	T	1	modomics	cerevisiae
Gly-TCC-1	35	C
Gly-TCC-1	36	C
Gly-TCC-1	37	A
Gly-TCC-1	38	A
Gly-TCC-1	39	G
Gly-TCC-1	40	C
Gly-TCC-1	41	A
Gly-TCC-1	42	T
Gly-TCC-1	43	T
Gly-TCC-1	44	A
Gly-TCC-1	45	NA
Gly-TCC-1	45.1	NA
Gly-TCC-1	45.2	NA
Gly-TCC-1	45.3	NA
Gly-TCC-1	45.4	NA
Gly-TCC-1	45.5	NA
Gly-TCC-1	45.6	NA
Gly-TCC-1	45.7	NA
Gly-TCC-1	45.8	NA
Gly-TCC-1	45.9	NA
Gly-TCC-1	45.95	NA
Gly-TCC-1	46	G
Gly-TCC-1	47	C
Gly-TCC-1	48	T
Gly-TCC-1	49	C	?	PMC6380293	pombe
Gly-TCC-1	50	C
Gly-TCC-1	51	G
Gly-TCC-1	52	G
Gly-TCC-1	53	G
Gly-TCC-1	54	T	T	modomics	cerevisiae
Gly-TCC-1	55	T	P	modomics	cerevisiae
Gly-TCC-1	56	C
Gly-TCC-1	57	G
Gly-TCC-1	58	A
Gly-TCC-1	59	C
Gly-TCC-1	60	T
Gly-TCC-1	61	C
Gly-TCC-1	62	C
Gly-TCC-1	63	C
Gly-TCC-1	64	G
Gly-TCC-1	65	G
Gly-TCC-1	66	C
Gly-TCC-1	67	T
Gly-TCC-1	68	G
Gly-TCC-1	69	A
Gly-TCC-1	70	T
Gly-TCC-1	71	G
Gly-TCC-1	72	C
Gly-TCC-1	73	A
Gly-TCC-1	74	C
Gly-TCC-1	75	C
Gly-TCC-1	76	A
Gly-TCC-2	0	T
Gly-TCC-2	1	G
Gly-TCC-2	2	C
Gly-TCC-2	3	A
Gly-TCC-2	4	T
Gly-TCC-2	5	C
Gly-TCC-2	6	G
Gly-TCC-2	7	A
Gly-TCC-2	8	T
Gly-TCC-2	9	G	K	PMC4697793	cerevisiae
Gly-TCC-2	10	G
Gly-TCC-2	11	T
Gly-TCC-2	12	G
Gly-TCC-2	13	T	P	modomics	cerevisiae
Gly-TCC-2	14	A
Gly-TCC-2	15	G
Gly-TCC-2	16	C
Gly-TCC-2	17	NA
Gly-TCC-2	18	G
[truncated: 8,741 more rows]
